# Supplementary material for: Protective and Risk Factors for Mental Distress and Its Impact on Health-Protective Behaviors during the SARS-CoV-2 Pandemic between March 2020 and March 2021 in Germany
Source: Int J Environ Res Public Health. 2021 Aug 31;18(17):9167. doi: 10.3390/ijerph18179167 (PMC8431087; doi:10.3390/ijerph18179167)
Supplement: Supplementary file 1 [file ijerph-18-09167-s001.zip › ijerph-1316756-supplementary.pdf]

**Protective and Risk Factors for Mental Distress and Its Impact on Health-Protective Behaviors during the SARS-CoV-2 Pandemic between March 2020 and March 2021 in Germany**

Gilan et al.  
Supplementary Materials

**Table S1.** Items used to measure study variables.

|                                                                                         |                                                                                                                                                                                                                                                                                                                            |
|-----------------------------------------------------------------------------------------|----------------------------------------------------------------------------------------------------------------------------------------------------------------------------------------------------------------------------------------------------------------------------------------------------------------------------|
| Mental distress                                                                         | In the following you will find a description of how you possibly have felt or behaved recently. Please choose the answer that most accurately describes your well-being during the last week.                                                                                                                              |
|                                                                                         | <ul style="list-style-type: none"> <li>• I felt depressed.</li> <li>• I felt lonely.</li> <li>• I felt hopeful about the future</li> <li>• I felt nervous, anxious, or tense</li> <li>• Thoughts about the pandemic lead to physical reactions such as sweating, breathlessness, dizziness, or increased pulse.</li> </ul> |
| SARS-CoV-2-specific reappraisal                                                         | During the coronavirus-pandemic ...                                                                                                                                                                                                                                                                                        |
|                                                                                         | <ul style="list-style-type: none"> <li>• I find the necessary ways to keep going.</li> <li>• I know that I will not let it get me down.</li> <li>• I learn important and useful lessons for my life.</li> <li>• I learn possibilities to better cope with it next time.</li> </ul>                                         |
| Social interaction                                                                      | To what extend do the following statements apply to you in the current situation of limited contact possibilities?                                                                                                                                                                                                         |
|                                                                                         | <ul style="list-style-type: none"> <li>• I use phone and digital services to communicate with my family and friends.</li> <li>• I receive support offers from neighbors or relatives.</li> <li>• I offer help to others, for example helping neighbors do their grocery shopping.</li> </ul>                               |
| Maintaining a daily structure                                                           | To what extent do the following statements apply to you in the current situation of limited contact possibilities?                                                                                                                                                                                                         |
|                                                                                         | <ul style="list-style-type: none"> <li>• I have a plan for everyday life regarding sleep, work, and physical activities.</li> <li>• I am bored.</li> </ul>                                                                                                                                                                 |
| Frequency of information intake                                                         | <ul style="list-style-type: none"> <li>• How often do you seek information regarding the coronavirus/SARS-CoV-2?</li> </ul>                                                                                                                                                                                                |
| Note. All reported values are calculated as the mean values of all corresponding items. |                                                                                                                                                                                                                                                                                                                            |

Gilan et al.

Supplementary Materials

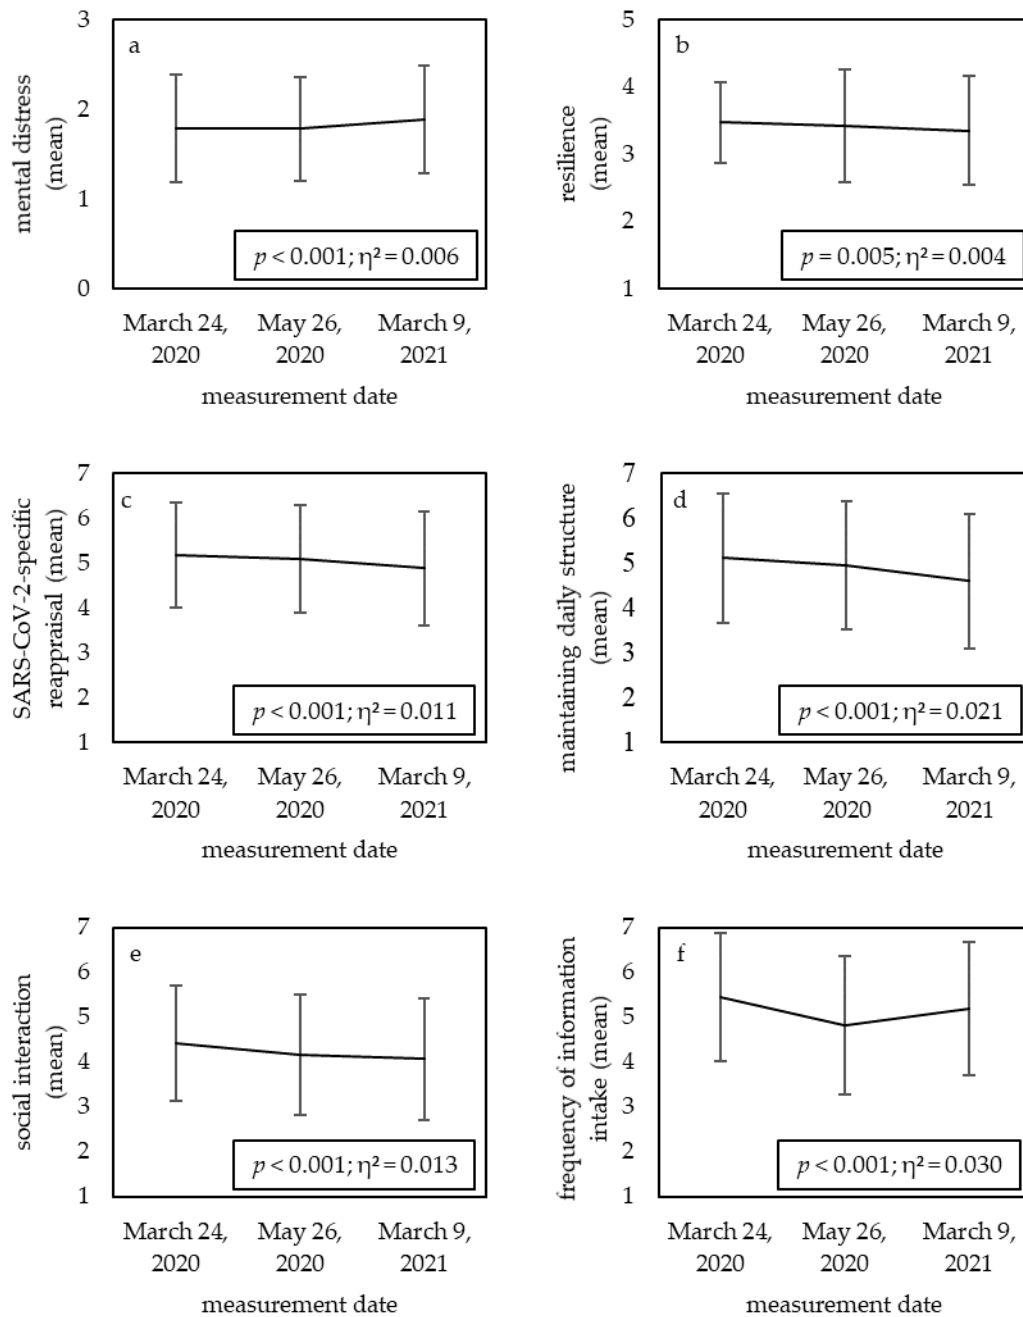

**Figure S1.** Changes in mental distress (a), resilience (b), SARS-CoV-2-specific reappraisal (c), maintaining daily structure (d), social interaction (e), and frequency of information intake (f) over time. Note: Due to the heterogeneity of variances between samples, differences in SARS-CoV-2-specific reappraisal were calculated via the Welch F-test. We applied an  $\alpha$  level of 0.005. Effect sizes  $\eta^2$ : small  $> 0.01$ , medium  $> 0.06$ , large  $> 0.14$ .
